# Supplementary material for: ﻿Three new genera and one new species of leaf insect from Melanesia (Phasmatodea, Phylliidae)
Source: Zookeys. 2022 Jul 5;1110:151–200. doi: 10.3897/zookeys.1110.80808 (PMC9848868; doi:10.3897/zookeys.1110.80808)
Supplement: Supplementary material 1 — Material examined [file zookeys-1110-151_article-80808__-s001.xlsx]

## Sheet: Sheet1
Supplementary File 1 to accompany Figure 5.
Species/Locality	Basis for record	Sex (♀, ♂)	Depository	Data	Identified by	Link
Rakaphyllium gen. nov.
Rakaphyllium schultzei (Giglio-Tos, 1912), comb. nov.
	Material Examined	(3 ♀♀, 3 ♂♂, 3 ♂♂ nymphs, 2 ♀♀ nymphs)
Mossu River	Specimen (Holotype)	1 ♀	SDEI	"New Guinea (No 131) VIII. 1910 L. Schultze L.J.; Pulchriphyllium schultzei Giglio-Tos, E. Giglio-Tos, det.; Mossu südl von Germainhuk; Holotypus; DEI Hemimetabola #100122”	Orig.Desc.	http://phasmida.speciesfile.org/Common/basic/Taxa.aspx?TaxonNameID=1200512
Jayapura	Specimen	1 ♀	Coll SLT	"Indonesia: Jayapura, Klaisu, July 2021"	R.Cumming
"New Guinea"	Specimen	1 ♀	Unknown	Specimen image posted on Instagram (user @mijas_vh) which appears to be from a Japanese collection with the simple data of "New Guinea"	R.Cumming
Morobe Province	Specimen	1 ♂	Coll DG	"Papua New Guinea: Morobe Province, circa 1990, possibly from Bulolo, Watut, or Aseki areas between 800 and 2,000 m. elv., no precis data associatted as the original collector collected in several areas"	D. Größer	https://commons.wikimedia.org/wiki/File:Phyllium_schultzei_-_male.jpg
Maanderberg	Specimen	1 ♂	MNHU	"D. N. Guinea 404 Maanderberg 21.-30.VIII.13 Kais. Augustafl. Exp. Burgers S. G."	R.Cumming
No data	Specimen	1 ♀ nymph	MAMU	No data	R.Cumming
"Central Papua"	Specimen	1 ♂ nymph	MAMU	"Central Papua" (very old label and very old pin)	R.Cumming
Urapura	Specimen	1 ♂ nymph	BPBM	"NEW GUINEA (Neth.) Wisselmeren: 1530 m. Urapura, Kamo V. Aug. 11, 1955; J. L. Gressitt Collector; BPBMENT 0000080367"	R.Cumming
Aru	Observation	1 ♂, 1 ♂ nymph, 1 ♀ nymph	//	Observed by Loïc Degen (Switzerland) on Wokam Island, Aru Islands, Indonesia, periodically since 2001.	R.Cumming	http://phasmida.speciesfile.org/Common/basic/ShowImage.aspx?TaxonNameID=1200512&ImageID=243758
Rakaphyllium exsectum (Zompro, 2001), comb. nov.
	Material Examined	(1 ♀)
Rawlinson Mts.	Specimen (Holotype)	1 ♀	NHMUK	"HOLO-TYPE; Rawlinson Mts. inland Huon Gulf. (Keysser).; Rothschild Bequest B. M. 1939-I.; Rawlinson Mt; Phyllium exsectum ♀ Zompro n. sp. HOLOTYPUS det. O. Zompro X.2000; BMNH(E) #845235"	Orig.Desc.	http://phasmida.speciesfile.org/Common/basic/Taxa.aspx?TaxonNameID=1200509
Vaabonbonphyllium gen. nov.
Vaabonbonphyllium groesseri (Zompro, 1998), comb. nov.
	Material Examined	(15 ♀♀, 2 ♂♂, 3 ♀♀ nymph, 2 ♂♂ nymph, 2 unsexed nymph)
Buin	Specimen (Holotype)	1 ♀	SMTD	"Buin I. Bougainville Arch. Salomons; 1941 4; Chitoniscus lobiventris Blanch. K. Gunther det.; lobiventris Blanch.; Chitoniscus Stal; Phyllium groesseri Zompro 1997 HOLOTYPUS det. O. Zompro X. 1996; HOLOTYPUS; Phyllium groesseri ♀ Zompro n. sp. HOLOTYPUS det. O.Zompro V.1998"	Orig.Desc.	http://phasmida.speciesfile.org/Common/basic/Taxa.aspx?TaxonNameID=1200511
Buin	Specimen (Paratype)	1 ♂	ANIC (CSIRO)	"SOLOMON ISLANDS, Konga Village, Buin Area, Bougainville. 6.ii.-21.iii.1961 W. W. Brandt; Phyllium groesseri ♂ Zompro, 1998 PARATYPUS det O.Zompro IX.1997 (ANIC)" Data from Bonnie Koopmans, ANIC (CSIRO)	Orig.Desc.
Kieta	Specimen	1 ♀	SMTD	"Kieta Bougainbille; Phyllium siccifolium Wandl. Blatt Indien; Staatl. Museum fur Tierkunde Dresden"	R.Cumming
Small Malaita	Specimen	1 ♀	NHMUK	"SOLOMON IS. Malaita Small Malaita :? :1955 E.S. Brown, 2362; Chitoniscus sp. S. Nakata 1965"	R.Cumming
*no data*	Specimen	1 ♀	NHMUK	No data	R.Cumming
Kolombangara	Specimen	1 ♀	NHMUK	"Solomon Islands Kolombangara 28 Feb 1983 M. Bigger; 505; C.I.E. Coll. A.15913; Pres by Comm Inst Ent B M 1987-1; Chitoniscus sp. near lobiventris (Blanchard) det. J. A. Marshall, 1986"	R.Cumming
Kolombangara	Specimen	1 ♂	NHMUK	"Kolombangara Solomon Islands 20 Oct 1983 M. Bigger; 506; C.I.E. Coll. A.15913; Pres by Comm Inst Ent B M 1987-1; Chitoniscus sp. det. J. A. Marshall, 1986"	R.Cumming
Honiara	Specimen	1 ♂ nymph	NHMUK	"Honiara Solomon Is. 30.i.64 R.W.Paine in forest; Green in life; Brit.Mus. 1966-55."	R.Cumming
Malaita	Observation	2 ♀♀, 1♀ nymph, 1 unsexed nymph	//	"Malaita Is., Solomon Islands, obs. by Chris Araitewa"	R.Cumming
Buin	Specimen	2 ♀♀	RBINS	"Buin Ile Bougainville Iles Salomon."	R.Cumming
Buin	Specimen	1 ♀	RBINS	"Buin, ile Bougainville Ach. Poncelet 1126.; leaf beetle Uba; R. Mus. Hist. Nat. Beig. I.G. 12.375"	R.Cumming
Buin	Specimen	1 ♀	RBINS	"Buin I. Bougainville; Chitoniscus lobiventris Blanch"	R.Cumming
Buin	Specimen	1 ♀	RBINS	"Buin I. Bougainville; Chitoniscus lobiventris Blanch, det K. Gunther 1942"	R.Cumming
Bougainville	Specimen	1 ♀	MNHN	"Ile de Bougainville Arch. Salomon"	R.Cumming
Nggela	Specimen	1 ♀	BPBM	"SOLOMON IS. FLORIDA IS., Nggela I. Haleta, 100 m. 10.x.1964; R. Straatman Collector BISHOP; In native garden; BPBMENT 0000080346"	R.Cumming
Togerao	Specimen	1 ♀ nymph	BPBM	"BOUGAINVILLE Togerao 600 m 15-21.4.1968; R. Straatman collectors BISHOP; BPBMENT 0000080347"	R.Cumming
Guadalcanal	Specimens	1 ♂ nymph, 1 unsexed nymph	BPBM	"SOLOMON IS. Guadalcanal, Gold Ridge 500 m. Vi-24-1956; J.L. Gressitt Collector" "BPBMENT 0000080348 & BPBMENT 0000080349"	R.Cumming
Bougainville	Specimen	1 ♀	ZFMK	"PHA 2001/79; Salomon Insel Bougainville 1939 SLg. R. Oberthur Eing. Nr.4, 1956."	R.Cumming
Bougainville	Specimen	1 ♀ nymph	ZFMK	"PHA 2001/80; Salomon Insel Bougainville 1939 SLg. R. Oberthur Eing. Nr.4, 1956."	R.Cumming
Vaabonbonphyllium rafidahae gen. et sp. nov.
	Material Examined	(1 ♂)
Mt.Hagen	Specimen (Holotype)	1 ♂	IMQC	"Papua New Guinea: Western Highlands Province (Highlands Region). Mt. Hagen Dist. (New Guinea Island) Mt. Hagen, along Highlands Hwy. (5 51’46.20”S; 144 13’30.75”E) Elev. 1730m 23-VI-1989 Coll. L D. Munsey."	Herein
Acentetaphyllium gen. nov.
Acentetaphyllium brevipenne (Größer, 1992), comb. nov.
	Material Examined	(8 ♀♀, 1 ♀ nymph)
Komba Dist.	Specimen (Holotype)	1 ♀	SDEI	"Deutsch-Neuguinea, Komba-Distrrict, Finisterre-Gebirge"	Orig.Desc.	http://phasmida.speciesfile.org/Common/basic/Taxa.aspx?TaxonNameID=1200495
Wau	Specimen	1 ♀	Coll SLT	"Wau 1200m Morobe Province P.N.G. 19 Jun. 2000"	R.Cumming
Wau	Specimen	1 ♀	Coll TM	"Papua New Guinea, Morobe, Wau, V.2003"	R.Cumming
Bulolo River	Specimen	1 ♀ nymph	MAMU	"P.N.G., Morobe, Junction of Bulolo River and Koranga Creek; 1941. K.464633"	R.Cumming
Bulolo	Specimens	2 ♀♀	BPBM	"PNG: New Guinea Morobe Prov. Bulolo, 750 m XI. 1979; Eucalyptus; M. Robinson Collector, BISHOP" "BPBMENT0000080388" and "BPBMENT0000080395"	R.Cumming
Wau	Observation	1 ♀	//	"February 2007 in Wau, Morobe Province, Papua New Guinea by Mathias Hoffmann"	R.Cumming	https://www.flickr.com/photos/93898066@N07/10760153076/in/photostream/
"New Guinea"	Observation	1 ♀	//	"Leaf insect (Phyllium sp.) female in rainforest New Guinea"	R.Cumming	https://www.alamy.com/stock-photo-leaf-insect-phyllium-sp-female-in-rainforest-new-guinea-29313808.html?pv=1&stamp=2&imageid=4755979B-601E-4FCD-A4CC-6A2842DAC923&p=26096&n=123&orientation=0&pn=1&searchtype=0&IsFromSearch=1&srch=foo%3Dbar%26st%3D0%26sortby%3D2%26qt%3Dphyllium%26qt_raw%3Dphyllium%26qn%3D%26lic%3D3%26edrf%3D0%26mr%3D0%26pr%3D0%26aoa%3D1%26creative%3D%26videos%3D%26nu%3D%26ccc%3D%26b…
//	Observation	1 ♀	//	Unspecified yellow form female specimen seen in a photo online with no details associated with it.	R.Cumming
Acentetaphyllium larssoni (Cumming, 2017), comb. nov.
	Material Examined	(3 ♂♂)
Cyclops Mts.	Specimen (Holotype)	1 ♂	SDNHM	"Indonesia, Irian Jaya (Sentani), Cyclops Mts. 24. XII. 2008 (S 2°31’, E 140°31’) [Coll.RC 16-240]. Collected by Viktor Sinjaev"	Orig.Desc.	http://phasmida.speciesfile.org/Common/basic/Taxa.aspx?TaxonNameID=1233357
Humbolt Bay Dist.	Specimen	1 ♂	NHMUK	"DUTCH NEW GUINEA: Humbolt Bay Dist. 1937 W.Stuber. B.M.1938-177."	R.Cumming
Bewani Mts.	Specimen	1 ♂	NHMUK	"DUTCH NEW GUINEA: Humbolt Bay Dist. Bewani Mts. ix. 1937"	R.Cumming
Acentetaphyllium miyashitai (Cumming et al., 2020), comb. nov.
	Material Examined	(1 ♂)
Wau	Specimen (Holotype)	1 ♂	IMQC	"Papua New Guinea: Morobe Province, Wau: IX, 2000. From the collection of Tetsuo Miyashita, Japan"	Orig.Desc.	http://phasmida.speciesfile.org/Common/basic/Taxa.aspx?TaxonNameID=1240770
Acentetaphyllium stellae (Cumming, 2016), comb. nov.
	Material Examined	(2 ♂♂)
Cyclops Mts.	Specimen (Holotype)	1 ♂	SDNHM	"Indonesia, Irian Jaya (Jayapura), Cyclop Mts. 25–29. XII. 2009 (S 2°32, E 140°28) [Coll.RC 16–130]. Collected by Viktor Sinjaev."	Orig.Desc.	http://phasmida.speciesfile.org/Common/basic/Taxa.aspx?TaxonNameID=1230194
Bewani Mts.	Specimen	1 ♂	NHMUK	"DUTCH NEW GUINEA: Humbolt Bay Dist. Bewani Mts. ix. 1937"	R.Cumming
Acentetaphyllium sp. "Fak Fak"
	Material Examined	(1 ♀)
Fak Fak	Observation	1 ♀	//	"Indonesia: Fak Fak"	R.Cumming
