# Supplementary material for: ﻿Three new genera and one new species of leaf insect from Melanesia (Phasmatodea, Phylliidae)
Source: Zookeys. 2022 Jul 5;1110:151–200. doi: 10.3897/zookeys.1110.80808 (PMC9848868; doi:10.3897/zookeys.1110.80808)
Supplement: Supplementary material 5 — List of species and matrix of morphological characters for adults of outgroup phasmid and representatives from all Phylliidae genera for phylogenetic analyses [file zookeys-1110-151_article-80808__-s005.xlsx]

## Sheet: Table 1 &2
Supplementary Table 5 Morphological matricies.
List of species and matrix of morphological characters for adults of select species of outgroup phasmids and representatives from all Phylliidae genera for phylogenetic analyses.
?, missing data; -, inapplicable character
	Female
Species	1	2	3	4	5	6	7	8	9	10	11	12	13	14	15	16	17	18	19	20	21	22	23	24	25	26	27	28	29	30	31	32	33
Orthomeria kangi	2	0	-	-	0	-	-	-	-	-	0	5	0	4	-	-	-	-	2	2	1	1	0	0	1	-	0	3	0	1	1	?	?
Chitoniscus sp suva	0	0	1	2	0	0	0	1	1	0	1	3	2	2	1	0	0	1	0	-	0	1	0	1	1	0	0	0	0	0	1	0	1
Chitoniscus feejeeanus	0	0	1	-	0	0	0	1	1	0	1	3	2	2	1	0	0	1	0	-	0	1	0	0	1	0	0	0	0	0	1	0	1
Comptaphyllium riedeli	0	1	1	2	0	0	1	1	0	0	1	0	1	2	1	1	1	1	1	-	1	?	0	1	1	0	0	0	0	0	2	0	0
Comptaphyllium caudatum	0	1	1	2	0	0	1	1	0	0	1	0	1	2	1	0	1	1	1	-	1	0	0	1	1	0	0	0	0	0	1	0	0
Trolicaphyllium sarrameaense	0	0	1	3	0	0	1	1	1	0	1	3	2	2	1	1	0	1	0	-	1	1	0	2	1	3	0	0	0	0	0	0	1
Trolicaphyllium brachysoma	0	0	1	?	0	0	1	1	1	0	1	3	2	2	1	1	0	1	0	-	1	1	0	2	1	3	0	0	0	0	0	0	1
Walaphyllium zomproi	0	0	1	3	0	0	1	1	1	0	0	3	1	2	1	1	1	0	0	-	1	?	0	2	1	1	0	0	0	0	1	0	0
Walaphyllium monteithi	0	0	1	3	0	0	1	1	1	0	0	3	2	2	1	1	1	0	0	-	1	0	0	2	1	1	0	0	0	0	1	0	0
Acentetaphyllium brevipenne	0	0	1	?	0	1	2	0	0	3	?	3	2	0	3	2	2	2	0	-	1	1	0	2	1	4	0	2	0	0	0	0	0
Nanophyllium frondosum	0	0	1	2	0	1	2	0	0	3	1	3	2	2	1	0	0	2	0	-	1	1	0	2	1	5	0	1	0	0	0	0	0
Nanophyllium asekiense	1	0	1	3	0	1	2	0	0	3	1	3	2	2	1	0	0	2	0	-	1	1	2	2	1	5	4	1	0	0	0	0	0
Cryptophyllium oyae	0	0	1	4	0	0	2	0	0	3	0	0	1	2	1	1	1	1	2	1	1	1	4	2	1	2	0	0	0	0	1	0	2
Cryptophyllium westwoodii	0	0	1	3	0	0	2	0	0	3	0	1	1	2	1	1	1	1	2	1	1	1	0	2	1	2	0	0	0	0	1	0	1
Cryptophyllium bollensi	0	0	1	?	0	0	2	0	0	3	0	1	1	2	1	1	1	1	1	1	1	1	0	2	1	2	0	0	0	0	2	0	0
Microphyllium haskelli	0	1	0	0	0	0	1	2	1	2	0	3	2	2	1	1	0	2	0	-	1	1	0	0	1	0	0	0	0	0	1	2	0
Pseudomicrophyllium geryon	0	0	1	2	0	0	1	3	1	2	0	0	1	2	1	1	1	2	0	-	1	1	0	1	1	0	0	0	0	0	0	0	0
Pseudomicrophyllium pusillulum	0	1	1	1	0	0	1	3	1	2	0	3	2	2	1	1	1	2	0	-	1	1	2	1	1	0	0	0	0	0	1	0	0
Pulchriphyllium pulchrifolium	0	0	1	2	0	0	2	0	0	3	0	0	2	2	1	1	0	1	0	-	1	1	1	2	1	4	1	1	1	0	0	2	0
Pulchriphyllium giganteum	0	0	1	2	1	0	2	0	0	3	0	4	2	2	1	1	0	1	0	-	1	1	1	2	1	4	4	1	1	0	0	0	0
Pulchriphyllium bioculatum	0	0	1	2	0	0	2	0	0	3	0	0	2	2	1	1	0	1	0	-	1	1	1	2	1	4	1	0	1	0	0	2	0
Phyllium gantungense	0	0	1	3	0	0	1	1	1	0	0	1	1	2	1	1	1	1	0	-	0	1	0	2	1	0	0	0	0	0	1	0	0
Phyllium letiranti	1	0	1	3	0	0	1	1	1	0	0	0	1	2	1	1	1	1	0	-	0	1	0	2	1	1	0	0	0	0	2	0	0
Phyllium philippinicum	0	0	1	3	0	0	1	1	1	0	0	1	1	2	1	1	1	1	0	-	0	1	0	2	1	1	0	0	0	0	2	0	0
Phyllium ericoriai	0	0	1	2	0	0	1	1	1	0	0	0	1	2	1	1	1	1	2	0	0	1	0	2	1	2	0	0	0	0	2	0	0
Rakaphyllium schultzei	0	0	1	?	0	0	1	1	0	0	0	3	2	1	1	1	0	1	0	-	1	?	3	1	1	3	4	0	0	0	1	1	0
Rakaphyllium exsectum	0	0	1	?	0	0	1	1	0	0	0	3	2	1	1	1	0	1	0	-	-	?	3	1	1	2	?	?	0	0	1	1	0
Vaabonbonphyllium groesseri	0	1	1	?	0	0	?	1	1	0	1	3	2	2	0	0	0	1	0	-	1	?	3	1	1	0	0	0	0	0	1	0	1
	Male
Species	1	2	3	4	5	6	7	8	9	10	11	12	13	14	15	16	17	18	19	20	21	22	23	24	25
Orthomeria kangi	0	1	1	1	-	2	6	0	0	4	-	-	2	0	8	4	0	0	5	0	0	0	1	0	1
Chitoniscus sp suva	0	0	1	1	0	1	3	1	2	1	0	1	1	1	6	0	0	1	0	3	0	0	0	0	0
Chitoniscus feejeeanus	0	0	1	1	0	1	3	1	2	1	0	1	1	1	6	0	0	0	0	3	0	0	0	0	0
Comptaphyllium riedeli	2	0	1	1	0	0	0	1	1	1	0	0	1	1	1	0	0	2	0	3	0	0	0	0	2
Comptaphyllium caudatum	2	0	1	1	0	0	0	1	1	1	0	0	1	1	1	0	0	1	0	3	0	0	0	0	1
Trolicaphyllium sarrameaense	2	0	1	1	0	1	3	1	2	1	0	2	1	1	3	2	0	2	0	3	0	0	0	0	0
Trolicaphyllium brachysoma	2	0	1	1	0	1	3	1	2	1	1	2	1	1	3	2	0	2	0	3	0	0	0	0	0
Walaphyllium zomproi	2	0	1	1	0	0	3	1	1	1	1	2	1	1	5	0	0	2	1	3	0	0	0	0	0
Walaphyllium monteithi	2	0	1	1	0	0	3	1	2	2	1	2	1	1	5	0	0	2	0	3	0	0	0	0	0
Acentetaphyllium miyashitai	2	0	1	1	1	0	3	0	2	0	2	3	1	2	2	1	0	2	3	3	0	0	0	0	1
Acentetaphyllium larssoni	2	0	1	1	1	0	3	0	2	0	2	3	1	2	2	1	0	2	3	3	0	0	0	0	1
Acentetaphyllium stellae	2	0	1	1	1	0	3	0	2	0	2	3	1	2	2	1	0	2	3	3	0	0	0	0	1
Nanophyllium asekiense	2	0	1	1	1	0	3	0	2	0	2	3	1	2	1	0	2	1	0	3	5	0	0	0	1
Nanophyllium rentzi	2	0	1	1	1	0	3	0	2	0	2	3	1	2	1	0	4	1	4	3	5	0	0	0	1
Cryptophyllium oyae	2	0	1	1	0	0	0	0	1	2	1	2	1	1	6	0	0	2	1	3	0	0	0	1	0
Cryptophyllium westwoodii	2	0	1	1	0	0	1	0	1	1	1	2	1	1	6	0	0	2	2	3	0	0	0	1	0
Cryptophyllium bollensi	2	0	1	1	0	0	1	0	1	1	1	2	1	1	6	0	0	2	2	3	0	0	0	1	0
Microphyllium haskelli	0	0	0	0	0	0	3	3	1	1	0	3	1	3	6	0	0	0	5	1	0	0	0	?	?
Pseudomicrophyllium pusillulum	0	0	1	1	0	0	3	3	2	1	0	3	1	3	0	0	0	0	5	2	0	0	0	0	2
Pulchriphyllium pulchrifolium	2	0	1	1	0	0	0	0	2	1	1	2	1	2	7	3	1	2	3	3	1	1	0	0	2
Pulchriphyllium giganteum	2	0	1	1	0	0	2	0	2	1	0	1	1	2	7	3	1	2	3	3	5	1	0	0	2
Pulchriphyllium bioculatum	2	0	1	1	0	0	1	0	2	1	1	2	1	2	7	3	1	2	3	3	1	1	0	0	2
Phyllium gantungense	1	0	1	1	0	0	0	1	1	2	1	1	1	1	1	0	0	1	0	3	0	0	0	0	0
Phyllium letiranti	1	0	1	1	0	0	1	1	1	2	0	2	1	1	4	0	0	2	0	3	0	0	0	0	0
Phyllium philippinicum	2	0	1	1	0	0	1	1	1	1	0	1	1	1	?	0	0	2	0	3	0	0	0	0	0
Phyllium ericoriai	2	0	1	1	0	0	1	1	1	1	1	2	1	1	1	0	0	2	1	3	0	0	0	0	0
Rakaphyllium schultzei	2	0	1	1	0	0	5	1	2	1	0	1	1	0	1	0	3	1	0	3	4	-	0	0	2
Vaabonbonphyllium groesseri	2	0	1	1	0	1	3	1	2	1	0	1	1	1	4	0	3	1	0	3	3	3	0	0	2
Vaabonbonphyllium rafidahae	2	0	1	1	0	1	3	1	2	1	0	1	1	1	4	0	3	1	0	3	3	3	0	0	2
